# Supplementary material for: Small RNA and degradome sequencing reveal complex miRNA regulation during cotton somatic embryogenesis
Source: PubMed Central journal article supplement — J Exp Bot. 2013 Feb 4;64(6):1521–36. doi: 10.1093/jxb/ert013 (PMC3617824; doi:10.1093/jxb/ert013), 2013-02-04

miR156d

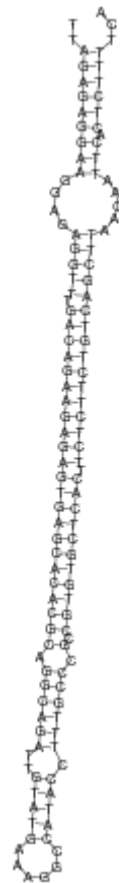

miR156e

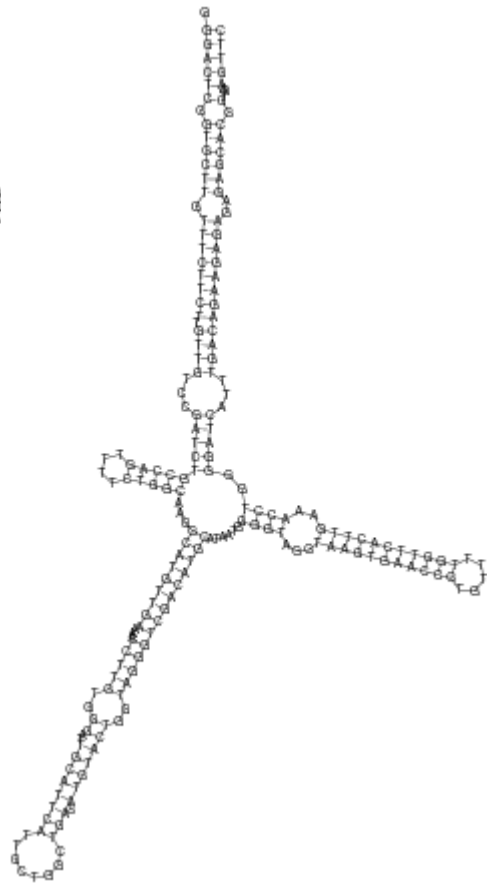

miR156f

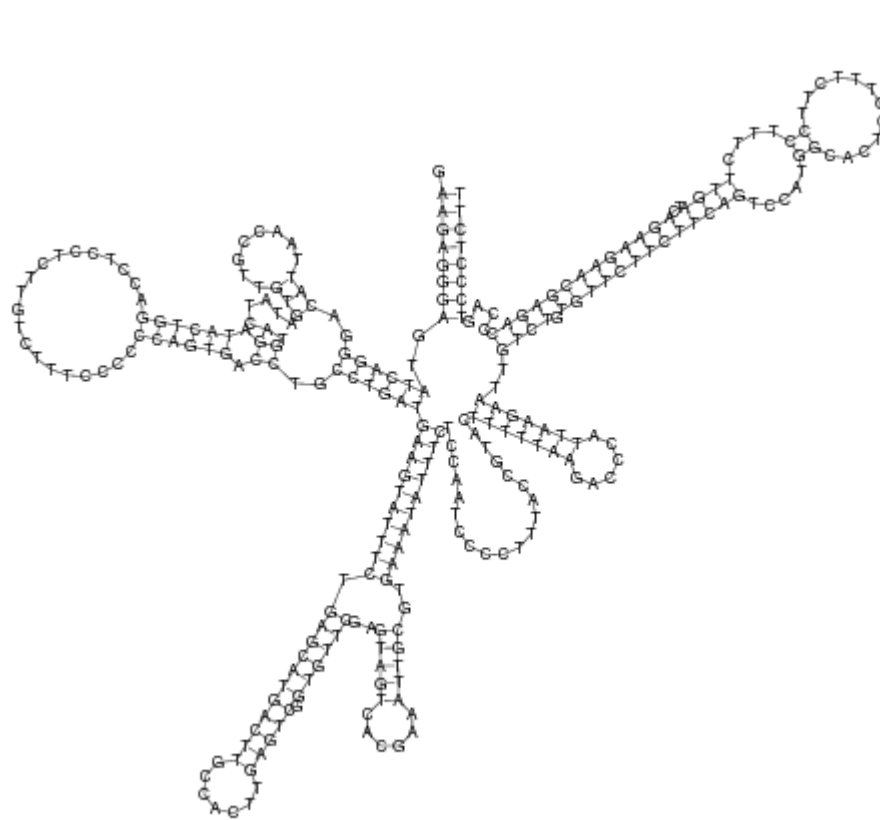

miR159

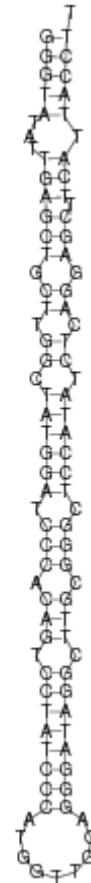

miR162a

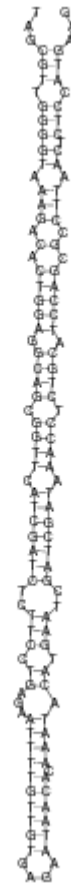

miR164 miR166b **miR171**

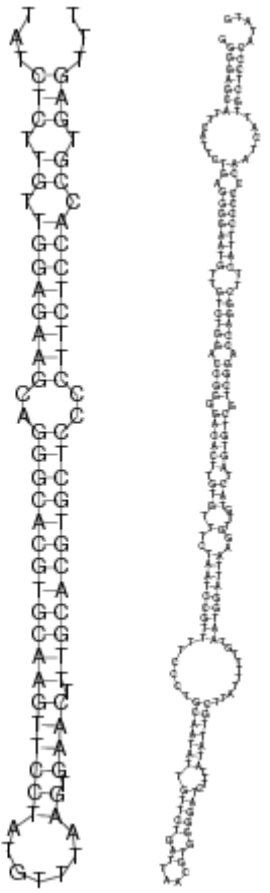

**miR171** **miR172a**

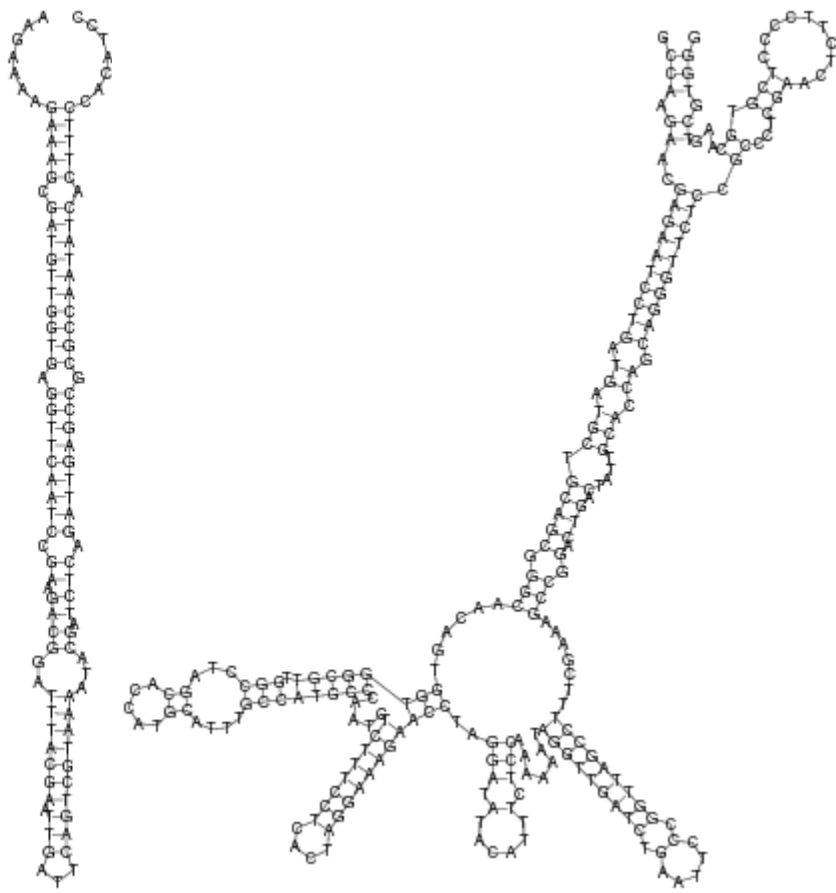

miR172 miR390a miR390b

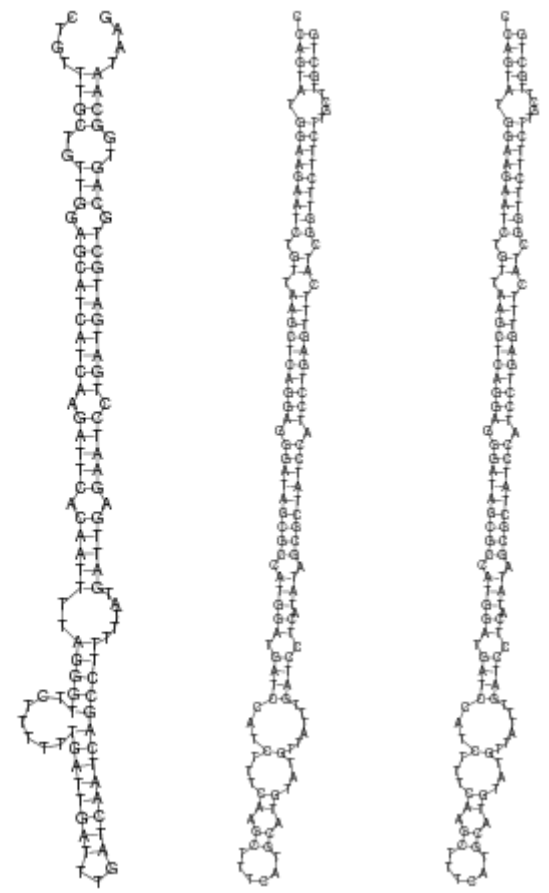

miR393    miR394a    miR394b    miR396a    miR396b    miR479    miR482a    miR482b    miR827a

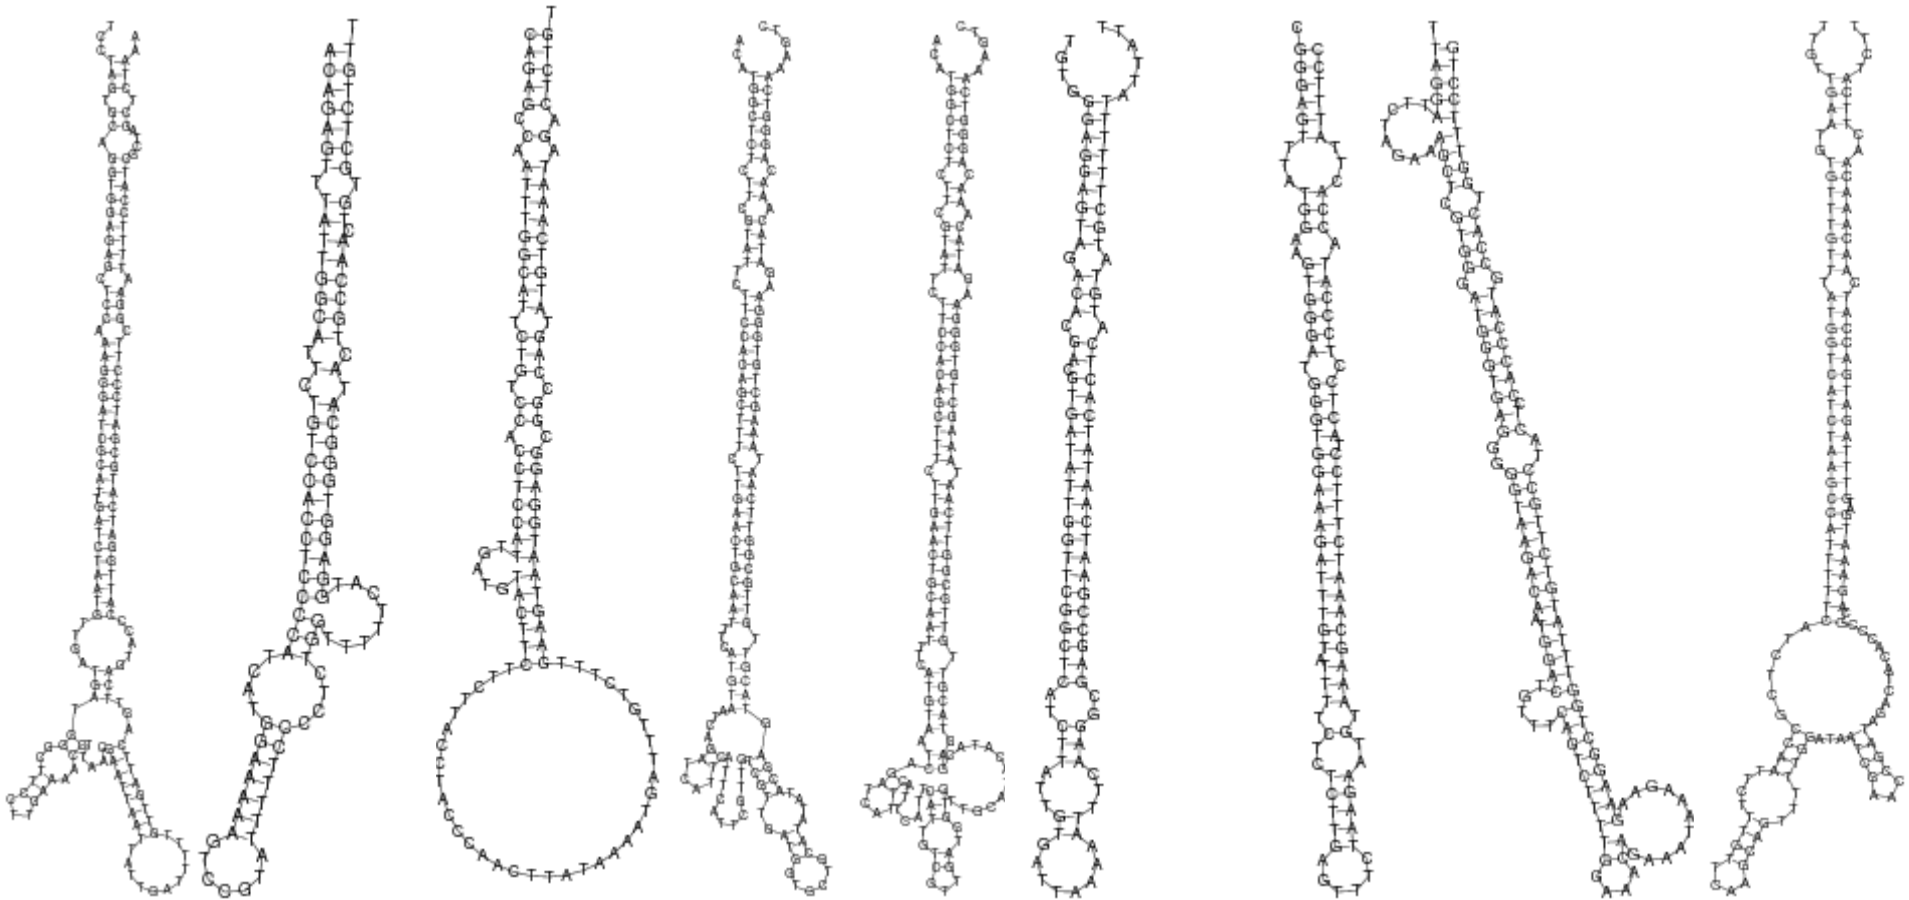

miR827b

miR827c

miR2937

miR2948

miR2949a

miR2949c

miR2950

miR3476

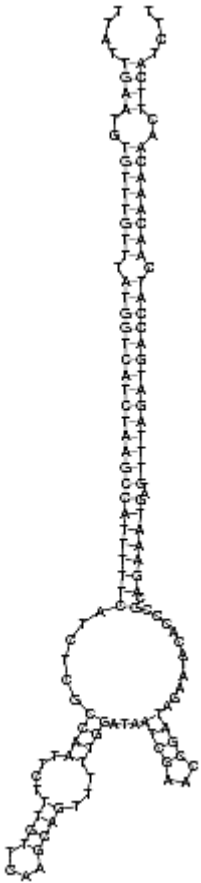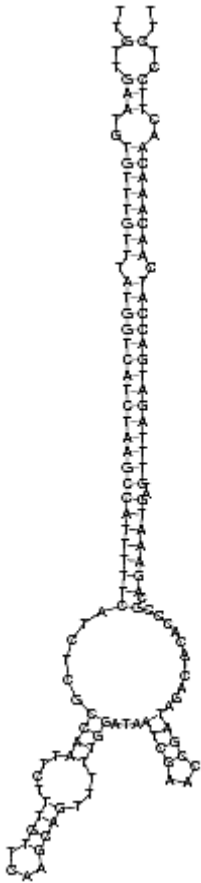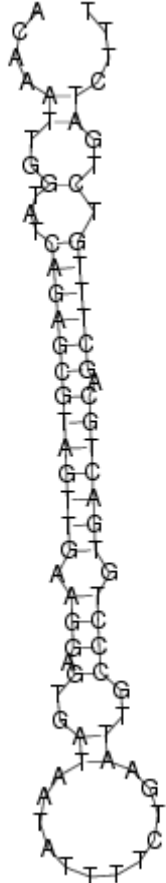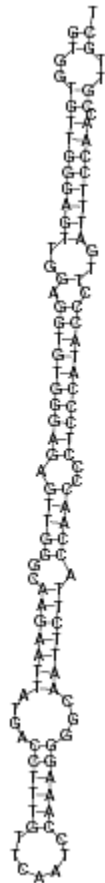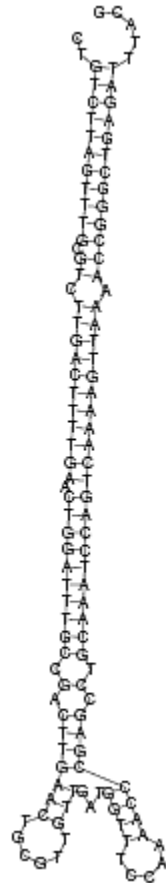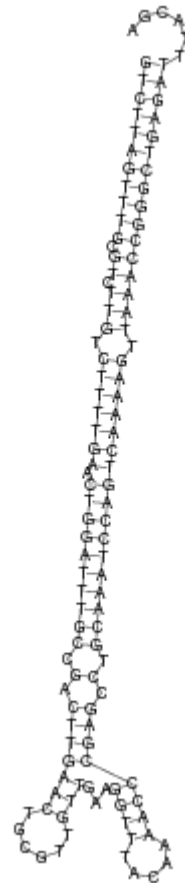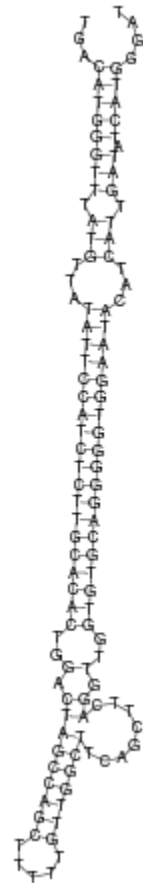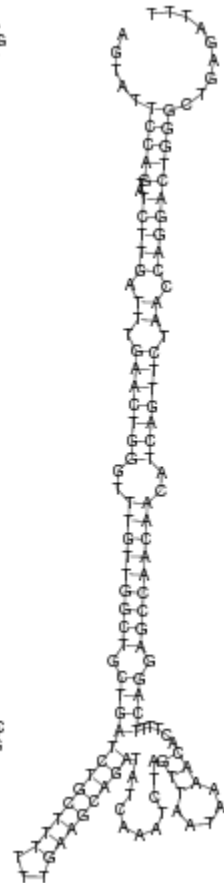

ghr-miR\_N1a

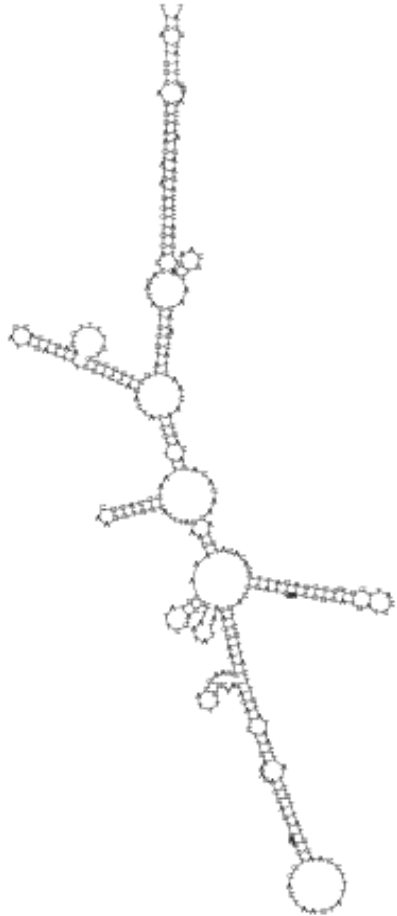

ghr-miR\_N1b

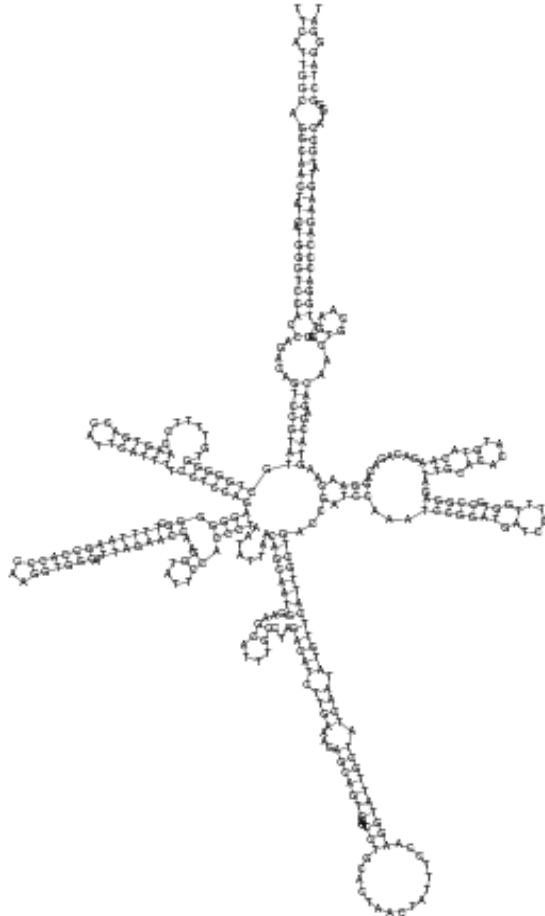

ghr-miR\_N2a

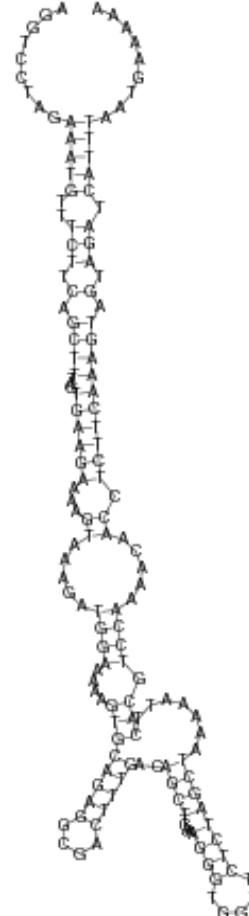

ghr-miR\_N2b

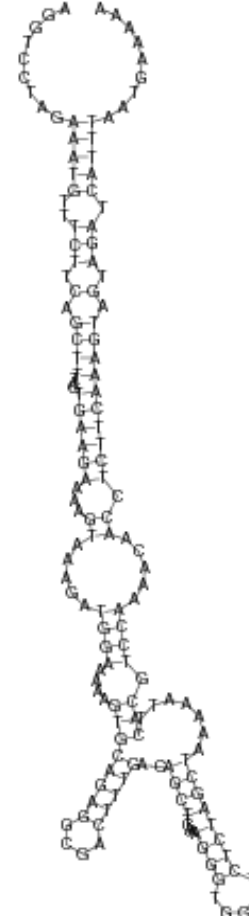

ghr-miR\_N3

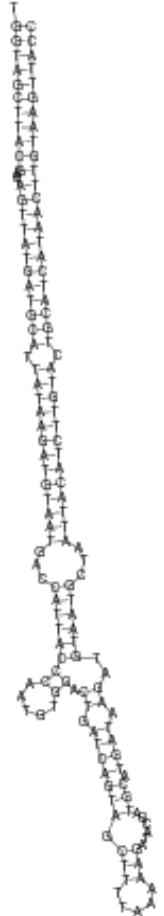

ghr-miR\_N4

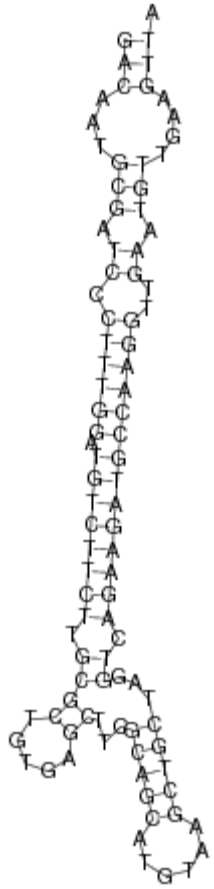

ghr-miR\_N5

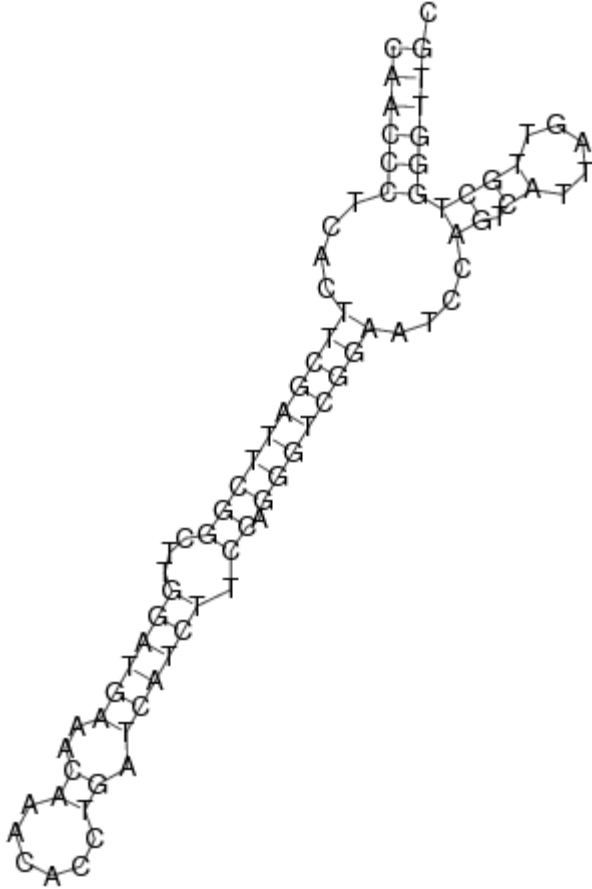

ghr-miR\_N6

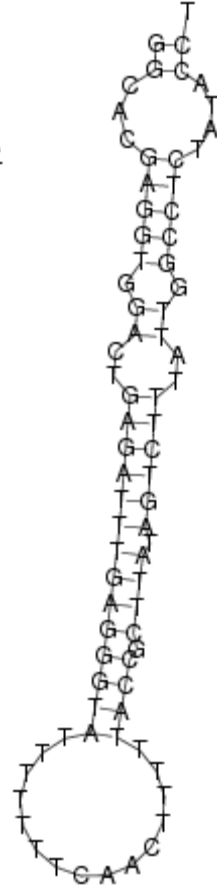

ghr-miR\_N7

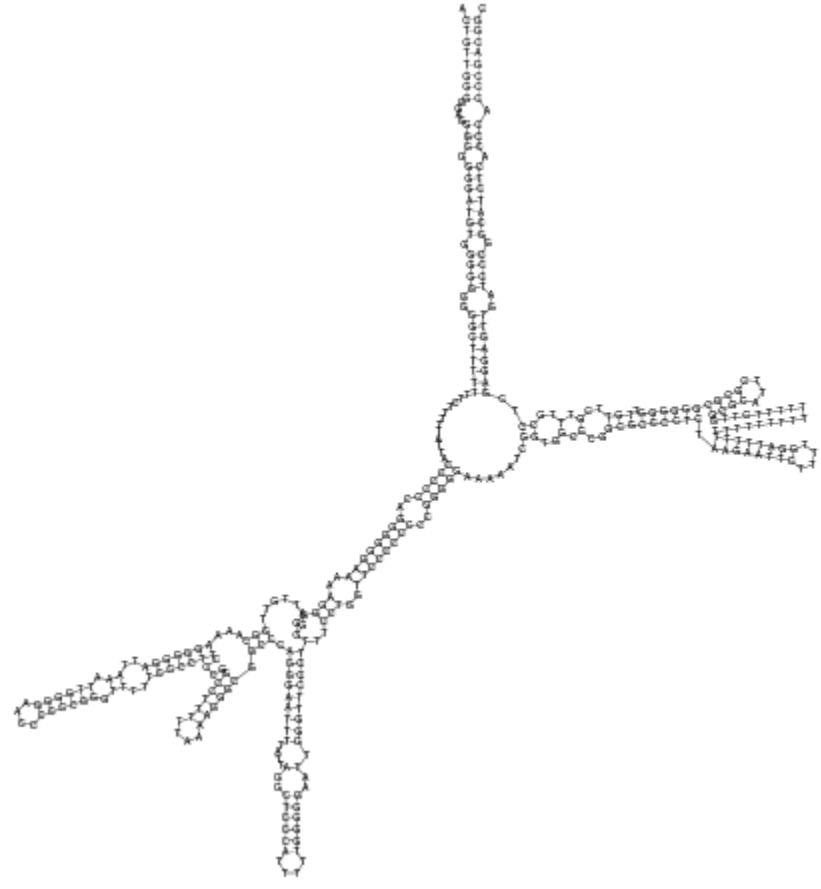

ghr-miR\_N8

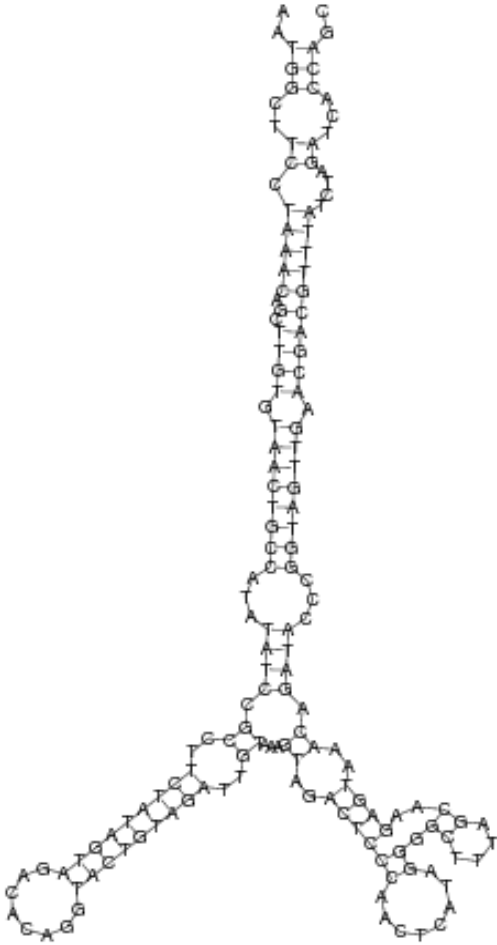

ghr-miR\_N9

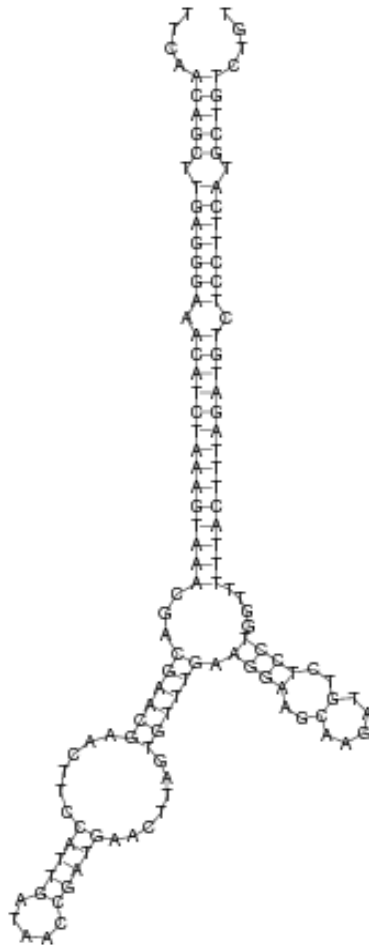

ghr-miR\_N10

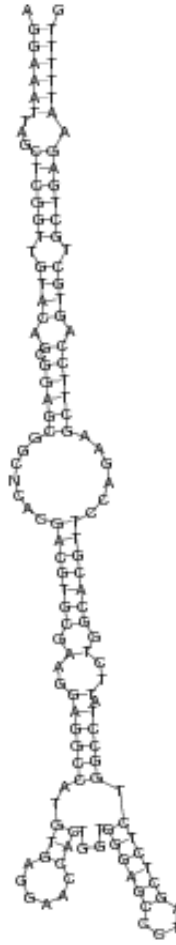

ghr-miR\_N11

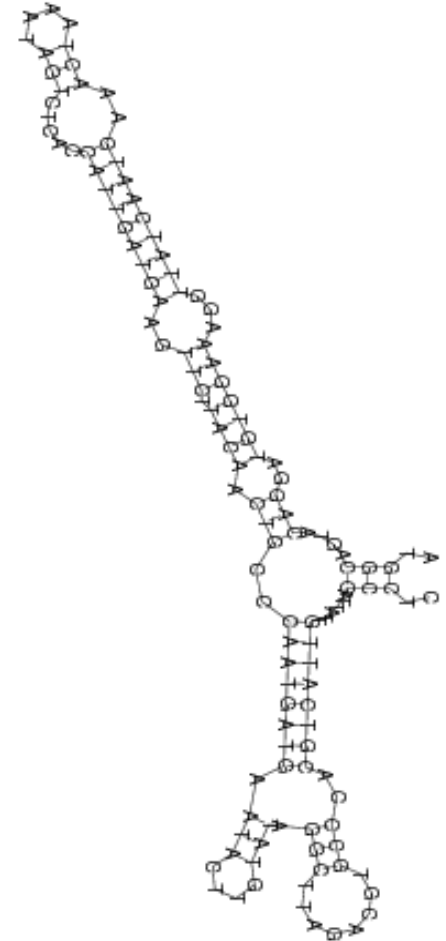

ghr-miR\_N12

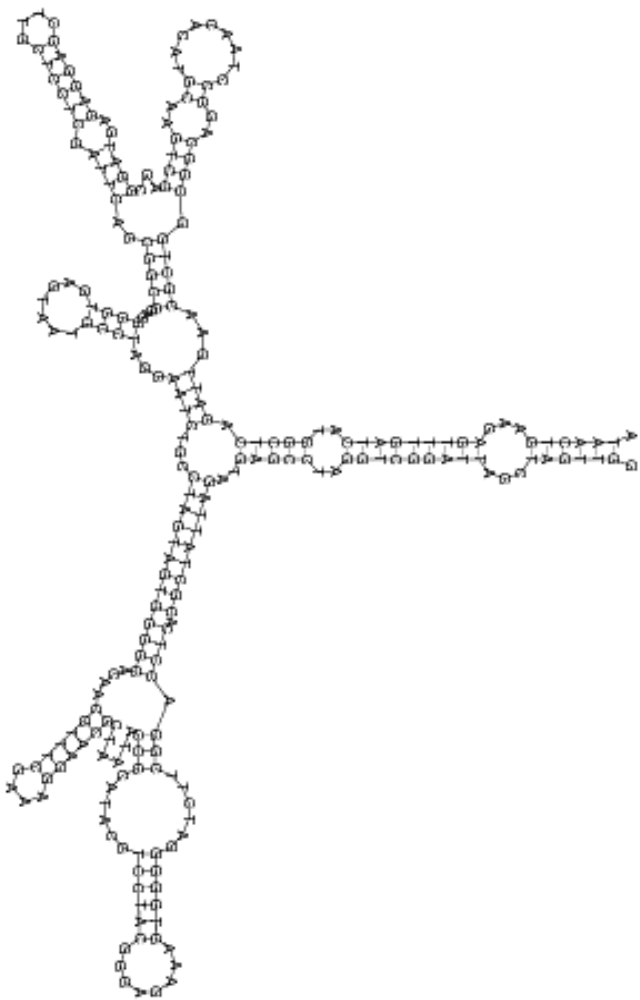

ghr-miR\_N13

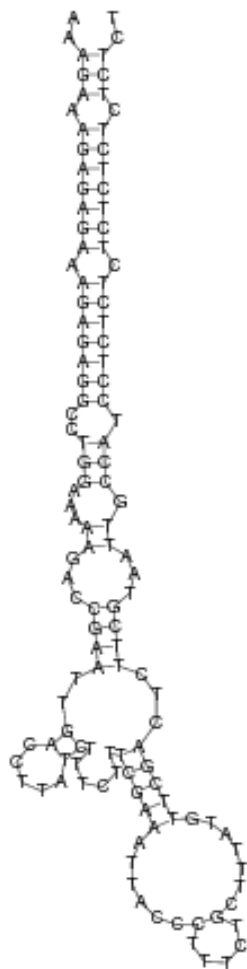

ghr-miR\_N14

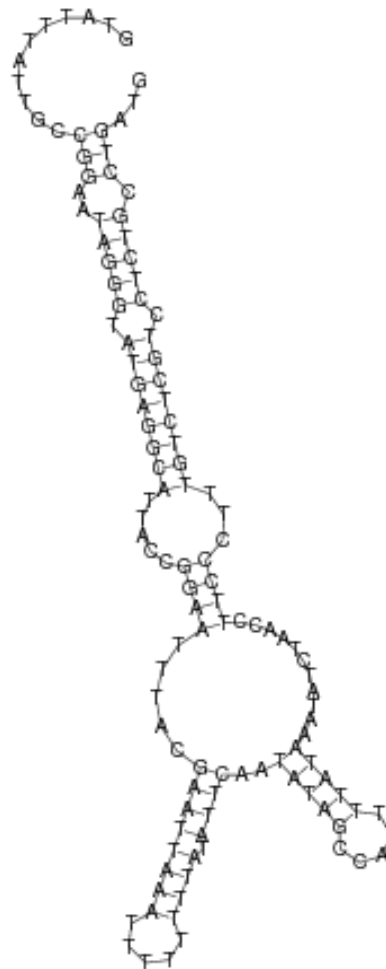

ghr-miR\_N15

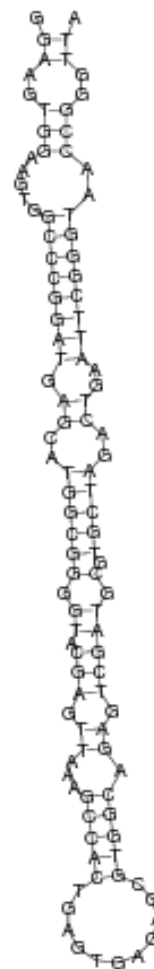



ghr-miR\_N16

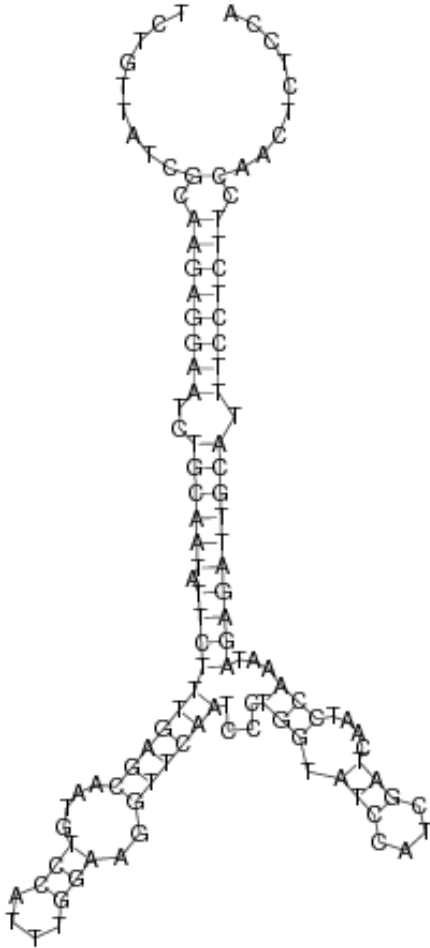

ghr-miR\_N17

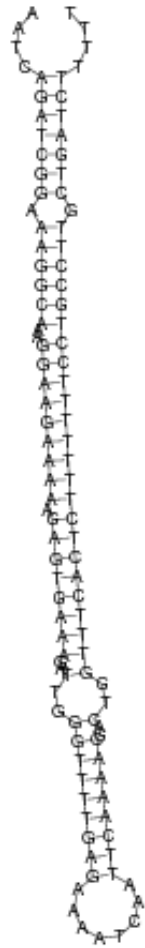

ghr-miR\_N18

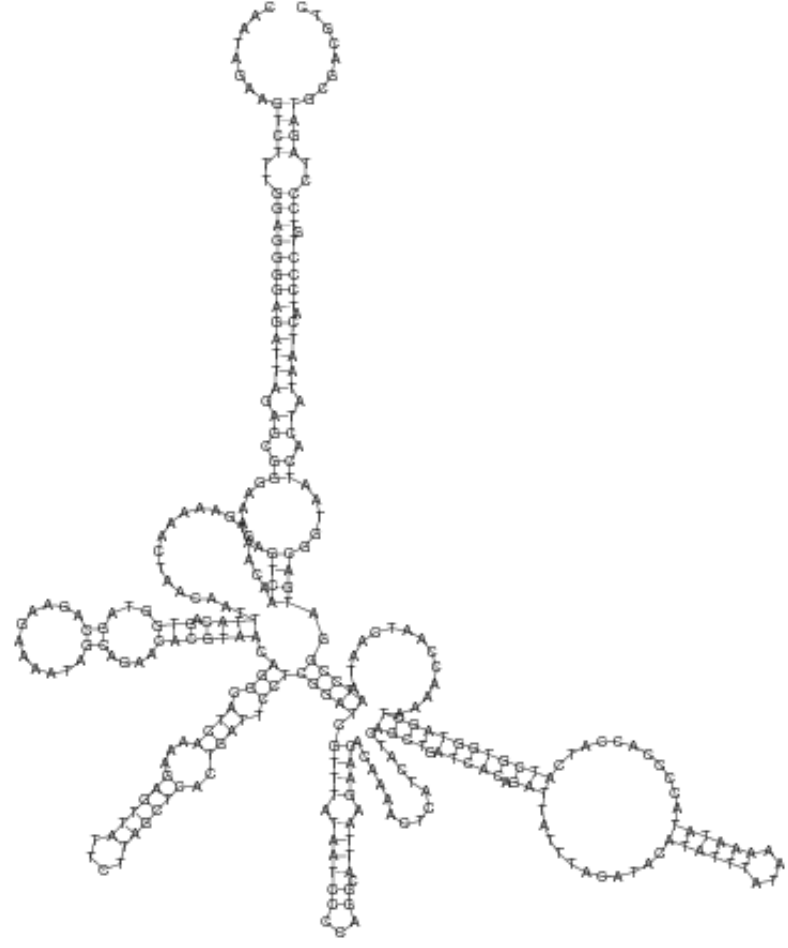

ghr-miR\_N19

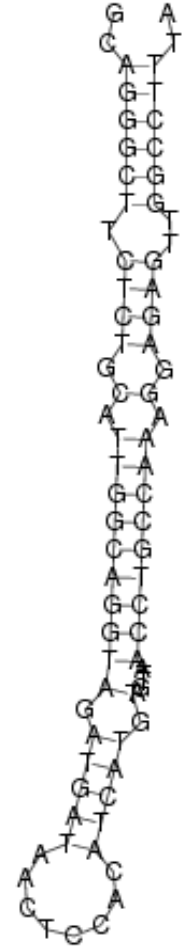

ghr-miR\_N20

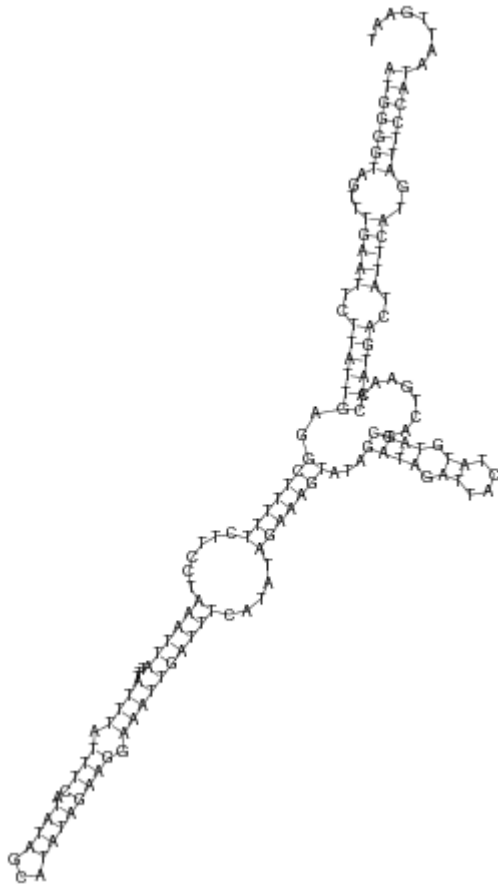

ghr-miR\_N21

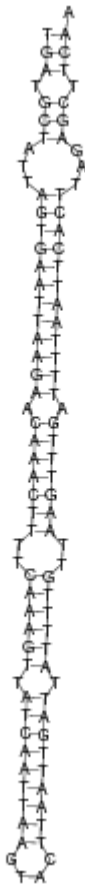

ghr-miR\_N22

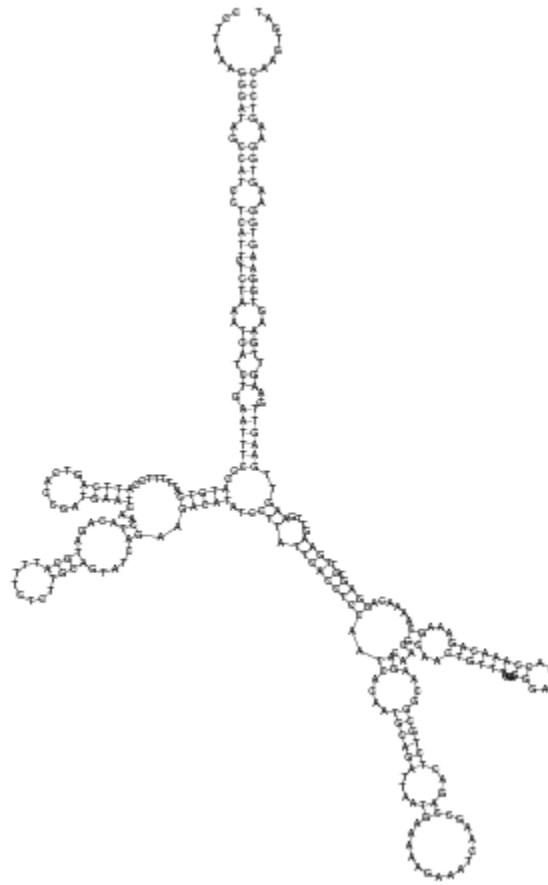

ghr-miR\_N23

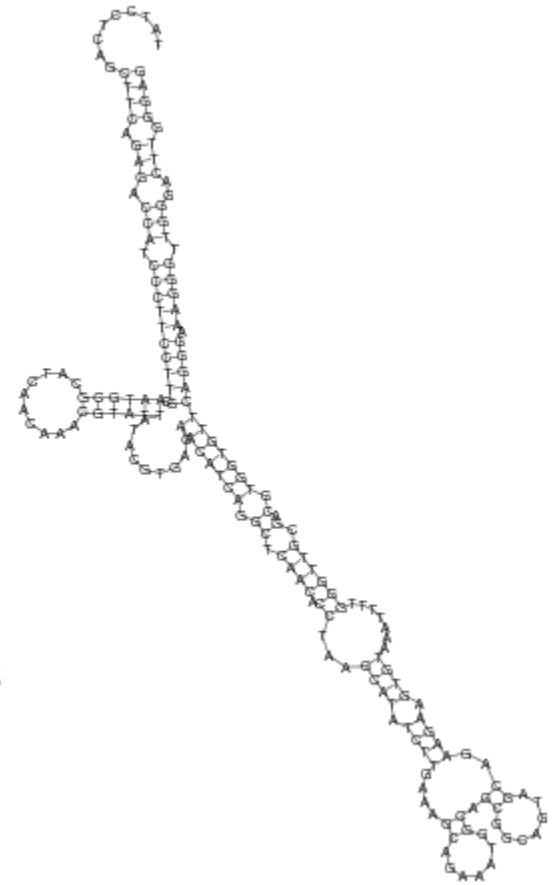

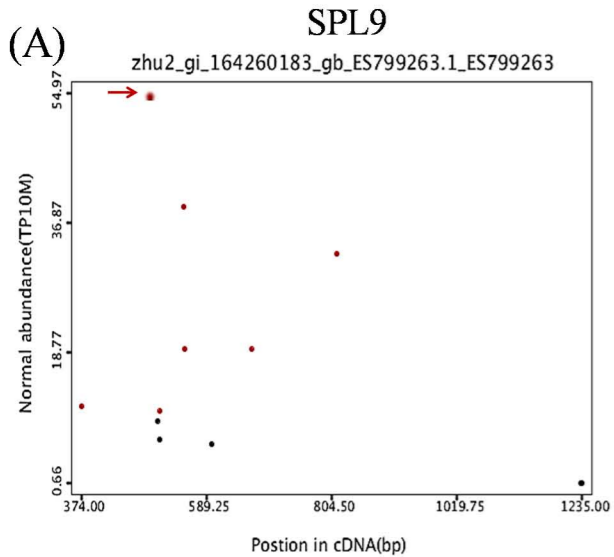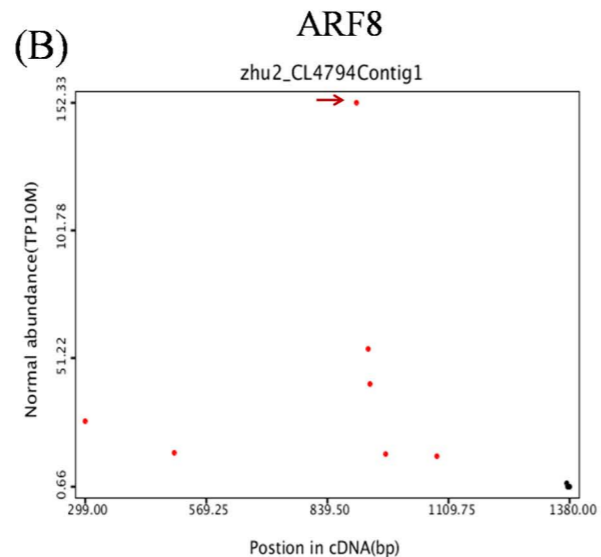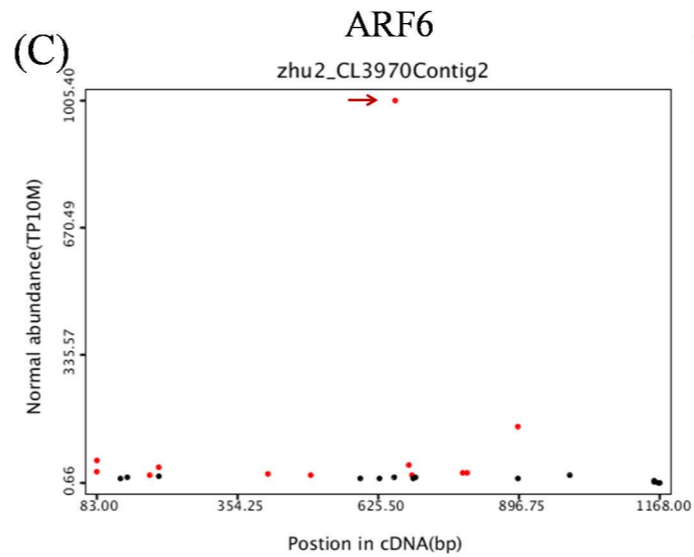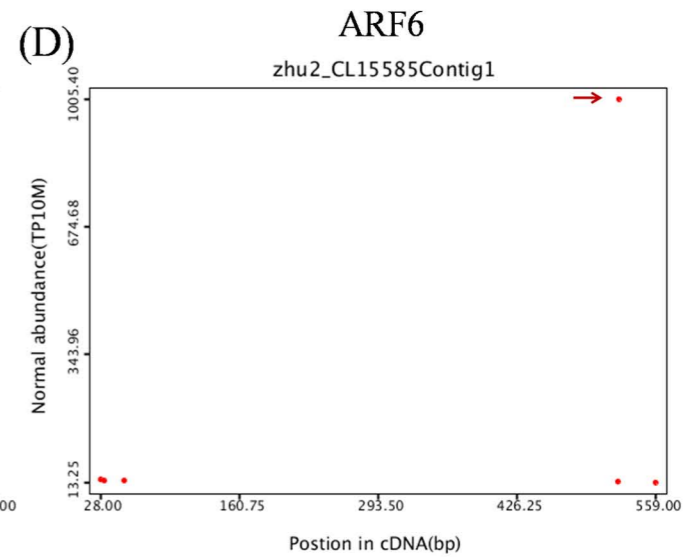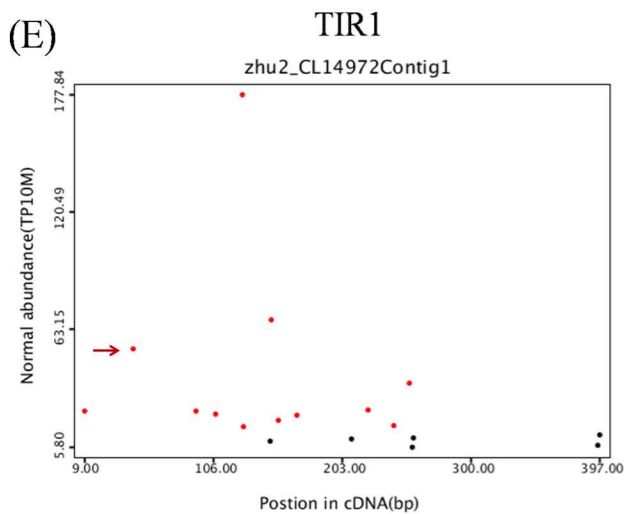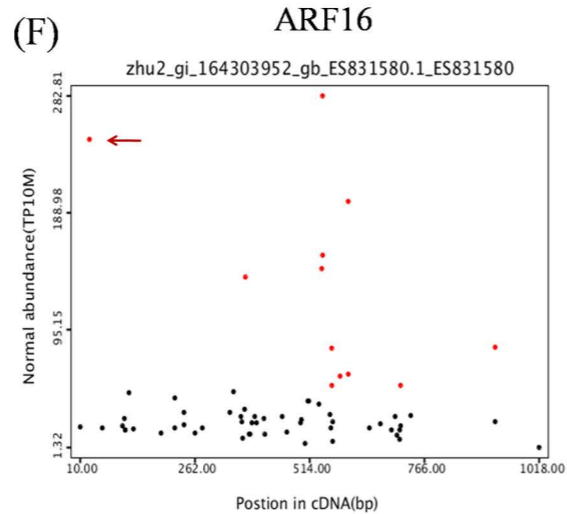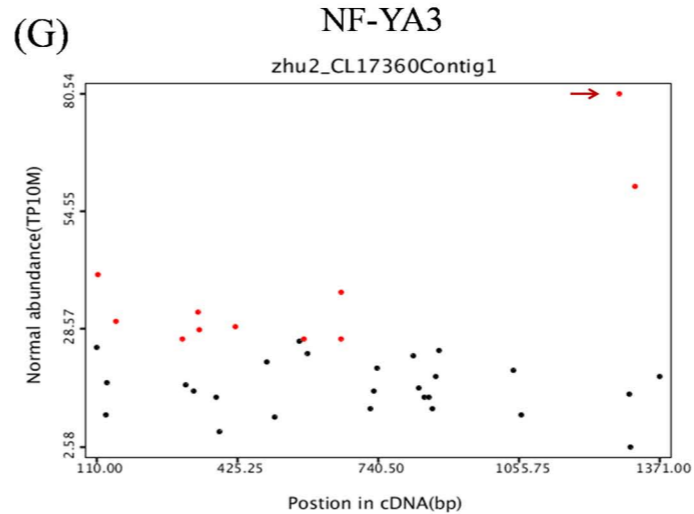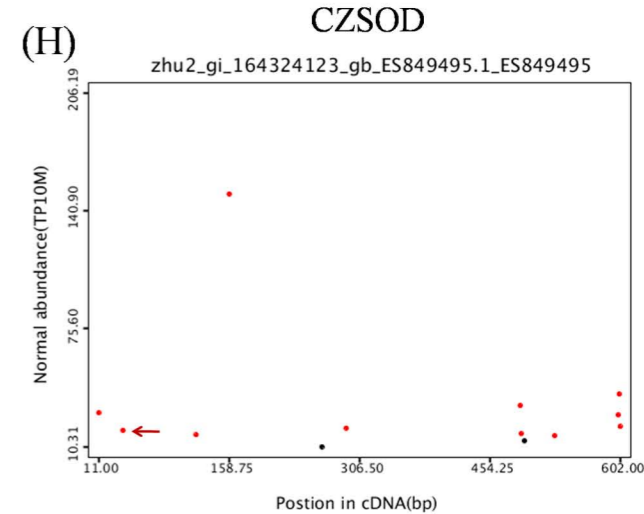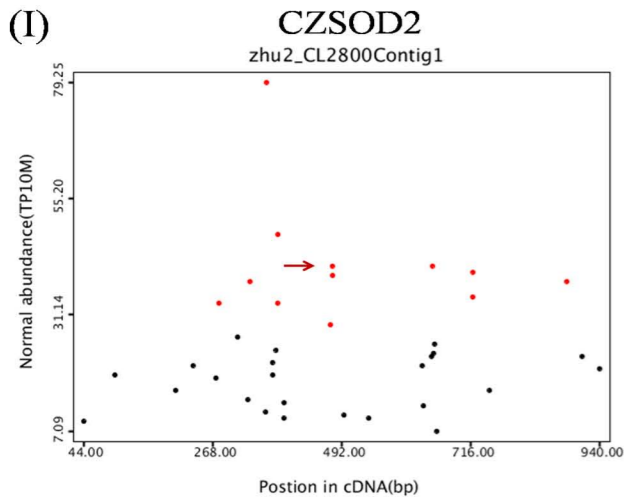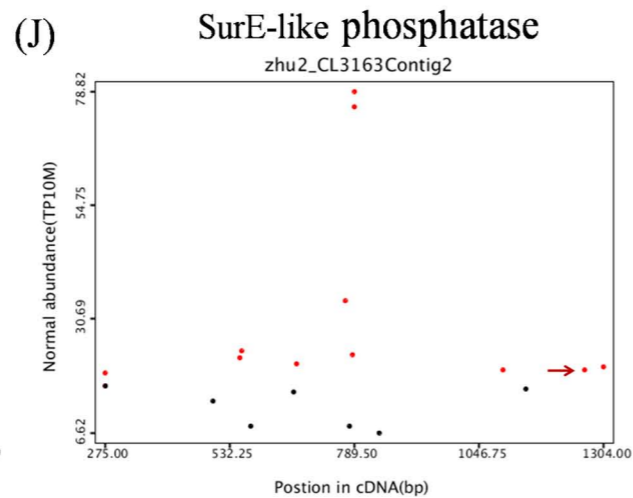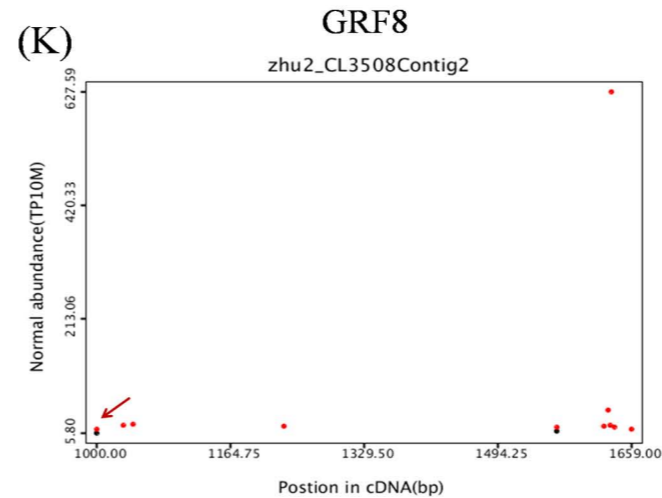

Supplement: supp_ert013_jexbot089789_file005.pdf [file supp_ert013_jexbot089789_file005.pdf]
